# Supplementary material for: Age-related changes in B cell metabolism
Source: publisher site journal article supplement (doi:10.18632/aging.102058), 2019-07-08
Supplement: Supplementary file [file aging-v11i13-102058-supplementary-material-SD1.pdf]

**SUPPLEMENTARY FIGURES**

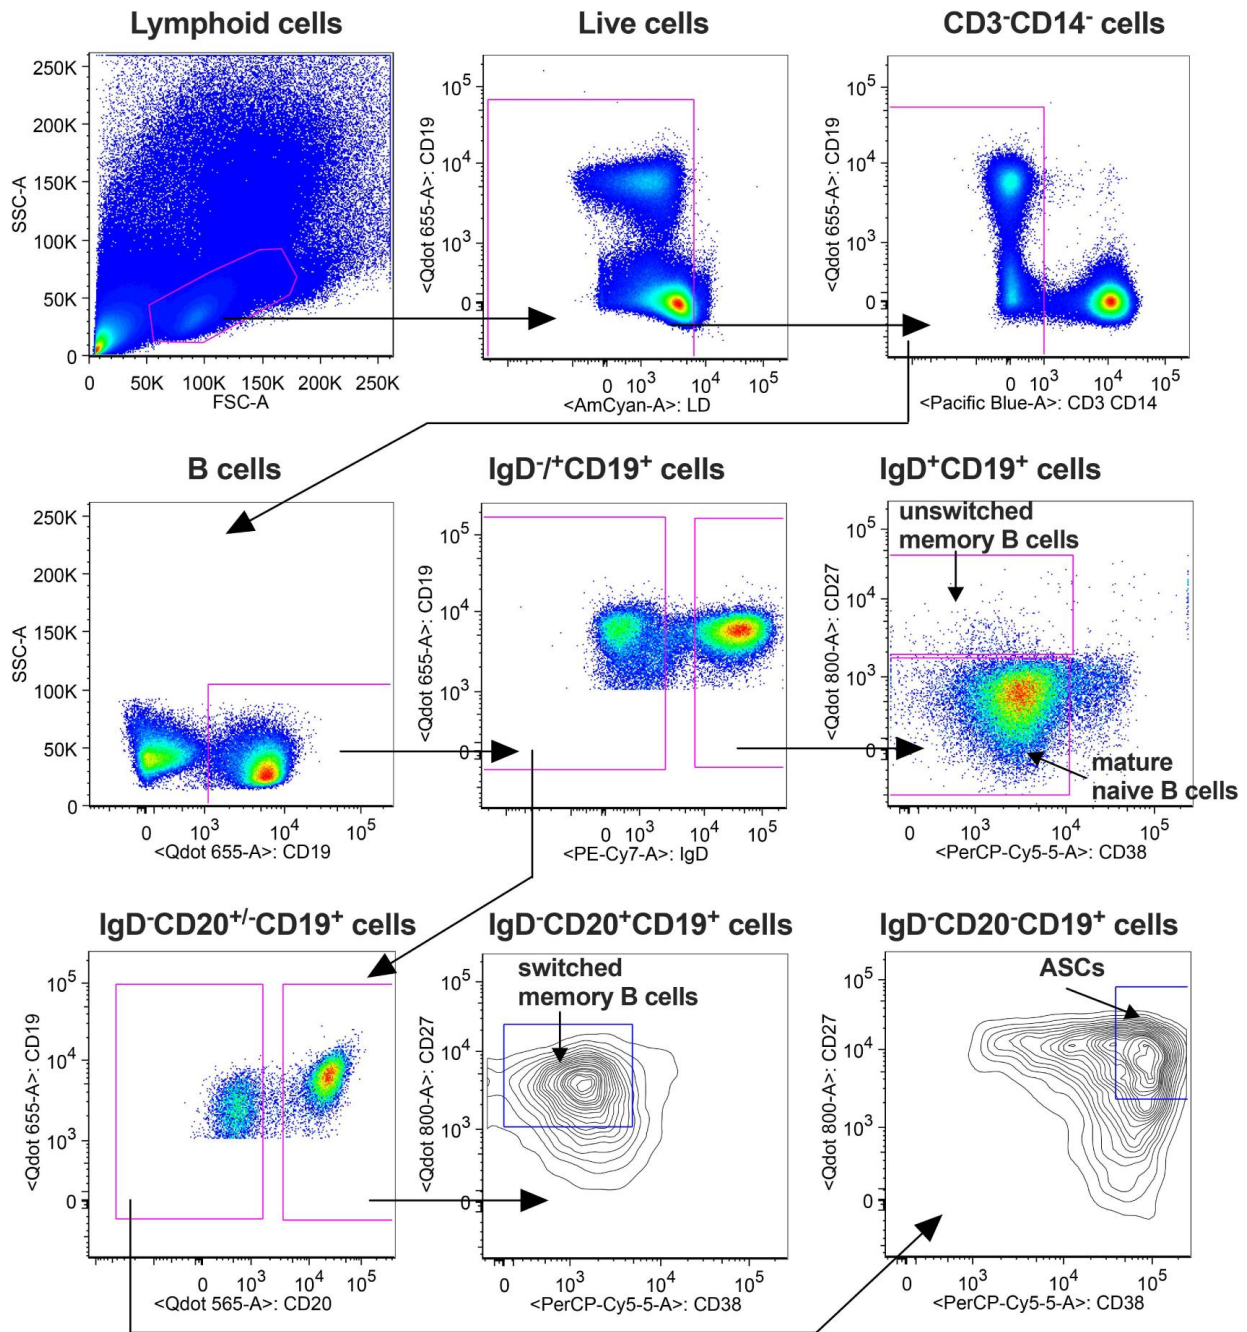

**Supplementary Figure 1. Gating strategy for B cell subsets.** PBMCs were stained with antibodies to CD3 and CD14 both labeled with Pacific Blue, a live cell stain, antibodies to CD19 (Qdot 655-A), IgD (PE-Cy7), CD27 (Qdot 800-A), CD38 (PerCP-Cy5-5-A) and CD20 (Qdot 565-A). Cells were first gate on lymphoid cells, then on singlets (not shown), live cells, CD3<sup>-</sup>CD14<sup>-</sup> cells and CD19<sup>+</sup> B cells. B cells were gated onto IgD<sup>+</sup> cells to identify CD27<sup>+</sup>CD38<sup>-</sup> mature naïve B cells and CD27<sup>+</sup>CD38<sup>+</sup> unswitched memory B cells, IgD<sup>-</sup> cells were used to identify CD20<sup>+</sup> and CD20<sup>-</sup> cells. CD20<sup>+</sup> cells were used to identify CD27<sup>+</sup>CD38<sup>-</sup> switched memory B cells and CD20<sup>-</sup> cells were used to identify CD27<sup>+</sup>CD38<sup>+</sup> ASCs. The sample was collected at v1 from an aged individual.

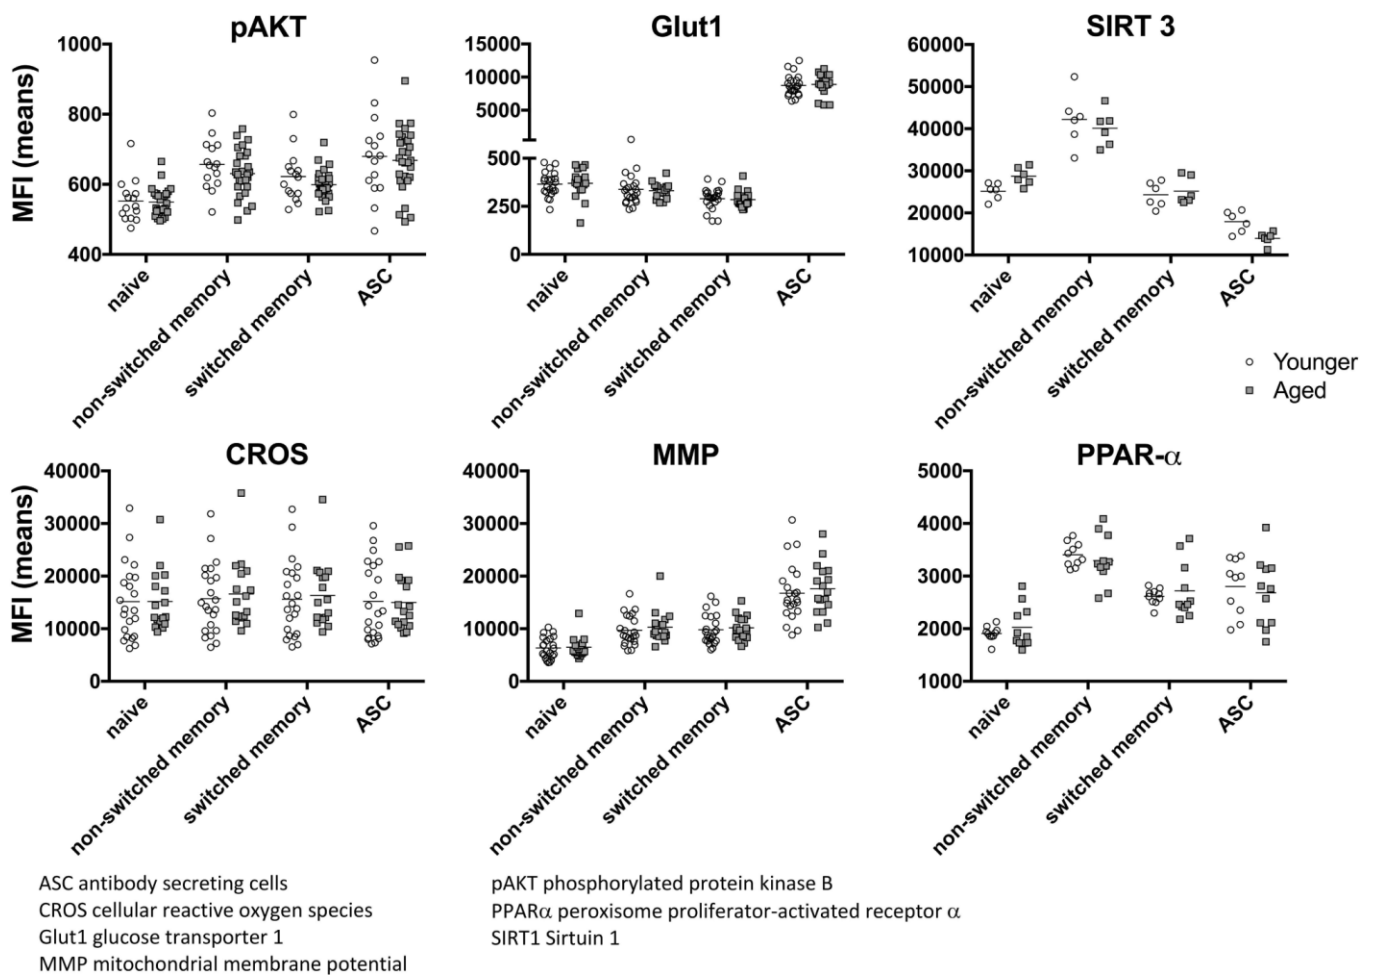

**Supplementary Figure 2. Metabolic phenotypes of B cells.** Graphs show mean fluorescent intensity (MFI) of stains for the indicated markers in or on different B cell subsets, i.e., naive B cells ( $IgD^+CD19^+CD27^-CD38^-$ ), unswitched memory B cells ( $IgD^+CD19^+CD27^+CD38^-$ ), switched memory B cells ( $IgD^-CD20^+CD19^+CD38^+CD27^-$ ) and ASCs ( $IgD^-CD20^-CD19^+CD38^+CD27^+$ ) of younger (open circles) or aged (grey squares) individuals. Graphs show results for individual samples with means.
